# Supplementary material for: Distributed source-relay selection scheme for vehicular relaying networks under eavesdropping attacks
Source: Springer Nature journal article supplement (doi:10.1186/1687-1499-2014-109), 2014-07-04

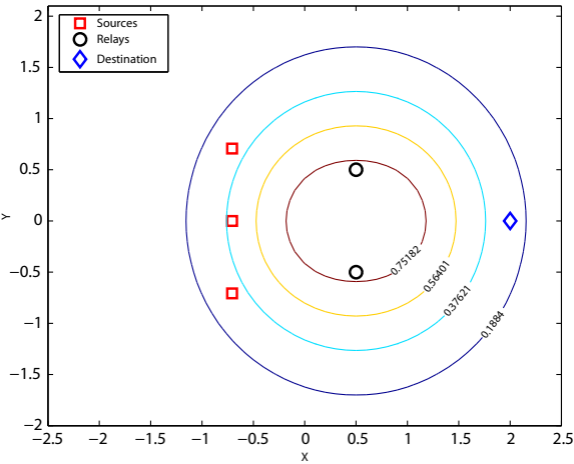

Supplement: 13638_2013_1049_MOESM7_ESM.pdf [file 13638_2013_1049_MOESM7_ESM.pdf]
